# Supplementary material
Source: Springer Nature journal article supplement (https://www.springermedizin.de/resource/supplementary/12872_2004_39_MOESM3_ESM.pdf/9430932)
Supplement: MOESM3 [file 9430932]

## My Difficulty in Making This Choice

Think about the choice between warfarin, aspirin, or nothing for the prevention of stroke. Please show how strongly you agree or disagree with these statements by circling a number from 1 (strongly agree) to 5 (strongly disagree). There are no right or wrong answers, we are interested in your feelings about this choice.

| Statement                                                             | How You Feel about the Statement |            |                                    |               |                           |
|-----------------------------------------------------------------------|----------------------------------|------------|------------------------------------|---------------|---------------------------|
|                                                                       | 1<br>Strongly<br>Agree           | 2<br>Agree | 3<br>Neither Agree<br>nor Disagree | 4<br>Disagree | 5<br>Strongly<br>Disagree |
| This choice is easy for me to make                                    | 1                                | 2          | 3                                  | 4             | 5                         |
| I'm sure what to do in this choice                                    | 1                                | 2          | 3                                  | 4             | 5                         |
| It's clear what choice (aspirin, warfarin, or nothing) is best for me | 1                                | 2          | 3                                  | 4             | 5                         |
| I'm aware of the choices I have to prevent stroke                     | 1                                | 2          | 3                                  | 4             | 5                         |
| I feel I know the benefits of each option                             | 1                                | 2          | 3                                  | 4             | 5                         |
| I feel I know the risks and side effects of each option               | 1                                | 2          | 3                                  | 4             | 5                         |
| I am clear about how important the benefits are to me in this choice  | 1                                | 2          | 3                                  | 4             | 5                         |
| I am clear about how important the risks are to me in this choice     | 1                                | 2          | 3                                  | 4             | 5                         |

| Statement                                                            | How You Feel about the Statement |            |                                    |               |                           |
|----------------------------------------------------------------------|----------------------------------|------------|------------------------------------|---------------|---------------------------|
|                                                                      | 1<br>Strongly<br>Agree           | 2<br>Agree | 3<br>Neither Agree<br>nor Disagree | 4<br>Disagree | 5<br>Strongly<br>Disagree |
| I know which is more important to me (the benefits or risks)         | 1                                | 2          | 3                                  | 4             | 5                         |
| I am making this choice without any pressure from others             | 1                                | 2          | 3                                  | 4             | 5                         |
| I have the right amount of support from others in making this choice | 1                                | 2          | 3                                  | 4             | 5                         |
| I have enough information/advice about options                       | 1                                | 2          | 3                                  | 4             | 5                         |
| I feel I have made an informed choice                                | 1                                | 2          | 3                                  | 4             | 5                         |
| My choice shows what is important to me                              | 1                                | 2          | 3                                  | 4             | 5                         |
| I expect to stick with my choice                                     | 1                                | 2          | 3                                  | 4             | 5                         |
| I am satisfied with my choice                                        | 1                                | 2          | 3                                  | 4             | 5                         |
